# Supplementary material for: Bank-Firm Credit Network in Japan: An Analysis of a Bipartite Network
Source: PLoS One. 2015 May 1;10(5):e0123079. doi: 10.1371/journal.pone.0123079 (PMC4416770; doi:10.1371/journal.pone.0123079)
Supplement: S4 Table — (XLSX) [file pone.0123079.s004.xlsx]

## Sheet: sum_stat_btype.txt
Year	Nbanks	Nfirms	Agriculture	city banks	foreign banks	Japan Policy Invest Bank	life insurance	local banks	long term banks	non-life insurance	other government	others	providers in folks	public library	second to silver	Shinkin Bank	trust banks
1996	224	1843	4	12	1	2	21	65	4	22	1	4	3	3	65	4	13
1997	223	1866	4	12	1	2	21	65	4	20	1	4	3	3	65	4	14
1998	221	1861	4	11	1	2	20	65	4	21	1	4	3	3	65	3	14
1999	217	1888	4	10	1	2	20	65	4	20	1	4	3	3	62	3	15
2000	219	1869	4	10	1	2	23	65	4	21	1	4	3	2	60	3	16
2001	207	1836	4	10	1	2	21	65	4	21	1	2	3	2	56	3	12
2002	202	1818	5	10	1	2	21	65	3	18	1	2	3	2	55	3	11
2003	195	1775	5	9	1	2	20	65	2	15	1	2	3	2	53	4	11
2004	193	1754	5	8	1	2	20	65	2	16	1	2	3	2	52	4	10
2005	185	1769	5	7	1	2	17	65	2	15	1	2	3	2	51	4	8
2006	180	1786	5	7	1	2	17	65	2	14	1	2	3	1	47	4	9
2007	178	1768	5	7	1	2	17	65	2	12	1	2	3	2	46	4	9
2008	176	1727	5	7	1	2	17	65	2	12	1	2	3	2	44	4	9
2009	173	1705	5	7	1	2	18	64	2	12	1	2	3	2	40	4	10
2010	172	1649	5	7	1	1	17	65	2	10	1	2	3	2	42	4	10
2011	164	1635	5	6	1	1	15	63	2	8	1	2	3	2	42	4	9
Min	164	1635	4	6	1	1	15	63	2	8	1	2	3	1	40	3	8
Max	224	1888	5	12	1	2	23	65	4	22	1	4	3	3	65	4	16
Average	195.562	1784.31	4.625	8.75	1	1.875	19.0625	64.8125	2.8125	16.0625	1	2.625	3	2.1875	52.8125	3.6875	11.25
Std	20.8198	77.2077	0.5	1.98326	0	0.341565	2.20511	0.543906	0.981071	4.47912	0	0.957427	0	0.543906	8.78042	0.478714	2.46306
Perc of Average	100		2.36497	4.47427	0.511345	0.958773	9.74752	33.1416	1.43816	8.21349	0.511345	1.34228	1.53404	1.11857	27.0054	1.88559	5.75264
	Nbanks	Nfirms	Agriculture	city banks	foreign banks	Japan Policy Invest Bank	life insurance	local banks	long term banks	non-life insurance	other government	others	providers in folks	public library	second to silver	Shinkin Bank	trust banks
